# Supplementary material for: Nanomolar-potency ‘co-potentiator’ therapy for cystic fibrosis caused by a defined subset of minimal function CFTR mutants
Source: PubMed Central journal article supplement (PMC6881293; doi:10.1038/s41598-019-54158-2), 2019-11-27
Supplement: 41598_2019_54158_MOESM1_ESM.pdf [file 41598_2019_54158_MOESM1_ESM.pdf]

## **Supplementary Material**

### **Nanomolar-potency ‘co-potentiator’ therapy for cystic fibrosis caused by a defined subset of minimal function CFTR mutants**

Puay-Wah Phuan<sup>1</sup>, Joseph-Anthony Tan<sup>1</sup>, Amber A. Rivera<sup>1</sup>, Lorna Zlock<sup>2</sup>, Dennis Nielson<sup>3</sup>,  
Walter E. Finkbeiner<sup>2</sup>, Peter M. Haggie<sup>1</sup> and A.S. Verkman<sup>1,4</sup>

<sup>1</sup>Department of Medicine, <sup>2</sup>Department of Pathology, <sup>3</sup>Department of Pediatrics, and

<sup>4</sup>Department of Physiology, University of California, San Francisco, San Francisco, CA, USA

Corresponding author: Puay-Wah Phuan. Department of Medicine, University of California, San Francisco, San Francisco, CA, USA. [puay-wah.phuan@ucsf.edu](mailto:puay-wah.phuan@ucsf.edu)

| CFTR mutation | Classification of defect                                  |
|---------------|-----------------------------------------------------------|
| G85E          | folding/maturation defect                                 |
| R334W         | folding/maturation and gating/conductance defects         |
| R347P         | folding/maturation and gating/conductance defects         |
| S492F         | folding/maturation and gating defect                      |
| V520F         | folding/maturation defect                                 |
| R560T         | folding/maturation defect                                 |
| A561E         | folding/maturation, gating/conductance defects, stability |
| L1077P        | folding/maturation, gating/conductance defects, stability |
| M1101K        | folding/maturation defect                                 |
| R1162X        | stability/truncation                                      |
| I1234del      | deletion                                                  |
| W1282X        | stability/truncation                                      |
| N1303K        | folding/maturation, gating/conductance defects            |
| Q1313X        | stability/truncation                                      |

**Supplemental Table 1.** Classification of cystic fibrosis mutations studied, as adapted from Veit, G. et al. Mol. Biol. Cell 27, 424-433 (2016).

Q1313X-CFTR

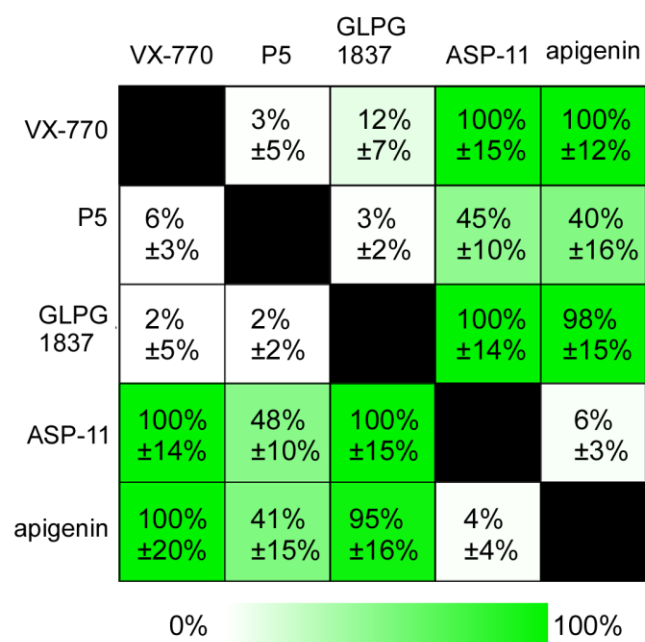

**Supplemental Figure 1.** Summary of relative Q1313X-CFTR activation in response to combinations of Class I and Class II potentiators. Mean ± S.E.M., n=3.

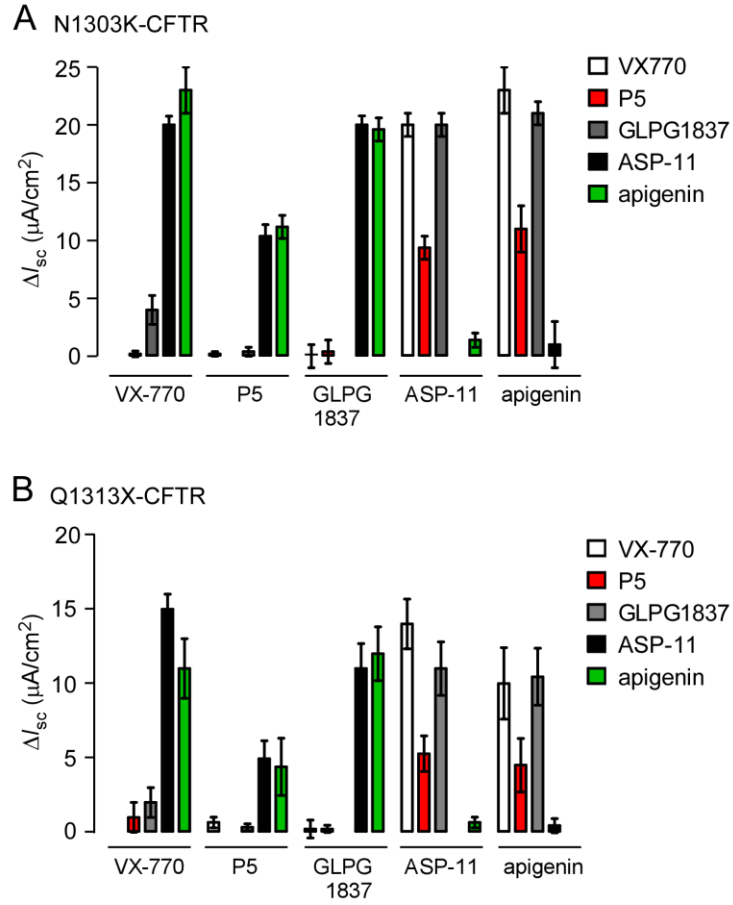

**Supplemental Figure 2.** Summary of short-circuit current responses to CFTR modulator combinations for **A**) N1303K-CFTR and **B**) Q1313X-CFTR in transfected FRT cells. Concentrations: 5  $\mu$ M VX-770, 20  $\mu$ M P5, 20  $\mu$ M ASP-11, 25  $\mu$ M apigenin. 20  $\mu$ M forskolin. Mean  $\pm$  S.E.M., n=3.
